# Supplementary material for: Intermediate-High-Dose Cyclophosphamide for Stem Cell Mobilization in Lymphoma: A Single-Center Retrospective Study
Source: Research Square preprint supplement (doi:10.21203/rs.3.rs-7227721/v1), 2025-08-12
Supplement: Supplementary file 1 [file 63a21fc449032700532c8f57.xlsx]

## Sheet: Sheet1
	Table 6 Result of subsequent autologous stem cell transplantation.
		Cy 3g/m2 (n=50)	Cy 4g/m2 (n=23)	P value
	Conditioning Regimen, n (%)			0.001
	SEAM	39 (78.0%)	9 (39.1%)
	SEAC	2 (4.0%)	5 (21.7%)
	TTBuCyE	3 (6.0%)	0 (0.0%)
	CBV	6 (12.0%)	9 (39.1%)
	Median refused CD34+ cells (×106 /kg)	5.49 ± 3.66	6.45 ± 5.49	0.379
	Median number of platelet transfusion (range)	5 (0-18)	3 (1-37)	0.986
	Median number of red blood cell transfusion (range)	0 (0-14)	2 (0-14)	0.097
	Time to neutrophil engraftment (d)	11.14 ± 3.12	10.47 ± 2.19	0.357
	Time to platelet engraftment (d)	11.44 ± 3.38	11.68 ± 2.69	0.776
