# Supplementary material for: Intermediate-High-Dose Cyclophosphamide for Stem Cell Mobilization in Lymphoma: A Single-Center Retrospective Study
Source: Research Square preprint supplement (doi:10.21203/rs.3.rs-7227721/v1), 2025-08-12
Supplement: Supplementary file 2 [file 6a51a1e56a5a909a46af67a9.xlsx]

## Sheet: Sheet1
	Table 5 Univariate analysis of factors influencing mobilization outcomes in lymphomas without usage of plerixafor.
		HR	95%CI	P value
	Gender	7.636	0.804-72.539	0.177
	Age	1.02	0.105-9.912	0.987
	Number of prior chemotherapy cycles	0.805	0.126-5.146	0.818
	Previous treatment	0.655	0.066-6.541	0.718
	Bone marrow involvement	4.123	1.018-6.836	0.032
	Disease status at mobilization	2.095	0.221-19.903	0.52
	Cy dosage	0.841	0.131-5.409	0.856
	Platelet < 30×109/L	0.633	0.098-4.100	0.632
	Hemoglobin<80g/L	0.182	0.019-1.725	0.138
