# Supplementary material for: Intermediate-High-Dose Cyclophosphamide for Stem Cell Mobilization in Lymphoma: A Single-Center Retrospective Study
Source: Research Square preprint supplement (doi:10.21203/rs.3.rs-7227721/v1), 2025-08-12
Supplement: Supplementary file 3 [file 7db6f33a0c40b758fb295c2b.xlsx]

## Sheet: Sheet1
	Table 1 Patient Characteristics.
		Cy 3g/m2 (n=55)	Cy 4g/m2 (n=26)	P value
	Median age, year (range)	52 (18-68)	53 (16-65)	0.956
	Male, n (%)	31 (56.3%)	16 (61.5%)	0.66
	Number of prior cycles of chemotherapy(median, range)	5 (4-15)	5 (3-13)	0.831
	Previous treatment			0.288
	Chemotherapy only	46 (83.6%)	24 (92.3%)
	Chemotherapy and radiotherapy	9 (16.4%)	2 (7.7%)
	Bone marrow involvement, n(%)			0.061
	No	41 (74.5%)	24 (92.3%)
	Yes	14 (25.5%)	2 (7.7%)
	Disease status at mobilization, n(%)			0.4
	CR	35 (63.6%)	19 (73.1%)
	PR	20 (36.4%)	7 (26.9%)
	Disease type, n(%)			0.759
	DLBCL	26 (47.2%)	16 (61.5%)
	PMLBL	1 (1.8%)	1 (3.8%)
	NKTCL	15 (27.2%)	4 (15.3%)
	HD	4 (7.3%)	2 (7.7%)
	Burkit	1 (1.8%)	0 (0.0%)
	MCL	2 (3.6%)	0 (0.0%)
	LBL	2 (3.6%)	0 (0.0%)
	PTCL	1 (1.8%)	1 (3.8%)
	AITL	1 (1.8%)	1 (3.8%)
	ALCL	2 (3.6%)	1 (3.8%)
	Plerixafor usage, n(%)			0.056
	No	44 (80.0%)	25 (96.2%)
	Yes	11 (20.0%)	1 (3.8%)
