# Supplementary material for: Intermediate-High-Dose Cyclophosphamide for Stem Cell Mobilization in Lymphoma: A Single-Center Retrospective Study
Source: Research Square preprint supplement (doi:10.21203/rs.3.rs-7227721/v1), 2025-08-12
Supplement: Supplementary file 4 [file a160bb68ccc7c17bd4f55c0c.xlsx]

## Sheet: Sheet1
	Table 3 The side effects of Cyclophosphamide dosage on hematopoietic stem cell mobilization.
		Cy 3g/m2	Cy 4g/m2	P value
	Platelet < 30×109/l			0.002
	Yes	11 (20.0%)	14 (53.8%)
	No	44 (80.0%)	12 (46.2%)
	Hemoglobin < 80g/l
	Yes	18 (32.7%)	16 (61.5%)	0.014
	No	37 (67.3%)	10 (38.5%)
	The minimum of WBC count (×109/l)	1.23±1.67	0.42±0.61	0.012
	Agranulocytosis lasting days (d)	2.92±2.37	4.53±2.67	0.033
	Febrile neutropenia			0.012
	Yes	26 (47.3%)	20 (76.9%)
	No	29 (52.7%)	6 (23.1%)
	Platelet transfusion			<0.001
	Yes	4 (7.3%)	14 (53.8%)
	No	51 (92.7%)	12 (46.2%)
	Hospital expenses during stem cell harvest (¥)	18088.04±9848.58	27326.31±1195.87	＜0.001
