# Supplementary material for: Intermediate-High-Dose Cyclophosphamide for Stem Cell Mobilization in Lymphoma: A Single-Center Retrospective Study
Source: Research Square preprint supplement (doi:10.21203/rs.3.rs-7227721/v1), 2025-08-12
Supplement: Supplementary file 5 [file a8843d9329f687d83f575c2c.xlsx]

## Sheet: Sheet1
	Table 2 The efficacy of Cyclophosphamide dosage in hematopoietic stem cell mobilization.
		Cy 3g/m2	Cy 4g/m2	P value
	Total CD34+ cells collected ≥ 2×106 /kg			0.347
	Yes	44 (80.0%)	23 (88.5%)
	No	11(20.0%)	3 (11.5%)
	Total CD34+ cells collected ≥ 5×106 /kg			0.495
	Yes	21(38.2%)	12 (46.2%)
	No	34(61.8%)	14 (53.8%)
	CD34+ cells collected ≥ 2×106 /kg on the first day			0.077
	Yes	44 (80.0%)	16 (61.5%)
	No	11 (20.0%)	10 (38.5%)
	CD34+ cells collected ≥ 5×106 /kg on the first day			0.995
	Yes	19 (34.5%)	9 (34.6%)
	No	36 (65.5%)	17 (65.4%)
