# Supplementary material for: Intermediate-High-Dose Cyclophosphamide for Stem Cell Mobilization in Lymphoma: A Single-Center Retrospective Study
Source: Research Square preprint supplement (doi:10.21203/rs.3.rs-7227721/v1), 2025-08-12
Supplement: Supplementary file 6 [file bc9934127f573242cba69233.xlsx]

## Sheet: Sheet1
	Table 4 Univariate logistic regression analysis of factors influencing mobilization outcomes.
		HR	95%CI	P value
	Gender	3.308	0.906-12.079	0.107
	Age	0.556	0.147-2.100	0.386
	Number of prior chemotherapy cycles	1.578	1.059-2.100	0.405
	Bone marrow involvement	2.421	1.109-3.628	0.21
	Disease status at mobilization	0.95	0.272-3.671	0.955
	Cy dosage	1.5	0.370-6.078	0.57
	Previous treatment	0.75	0.414-3.992	0.736
	Platelet < 30×109/l	0.76	0.205-2.820	0.682
	Hemoglobin <80g/l	0.459	0.132-1.595	0.221
	Infection during mobilization	0.65	0.179-2.364	0.513
	Plerixafor usage	0.056	0.013-0.241	<0.001
